# Supplementary material for: Predicting Geomagnetic Indices for Space Weather Applications in Solar Cycle 25
Source: Copernicus journal article supplement (doi:10.5194/angeo-2024-20), 2024-10-11

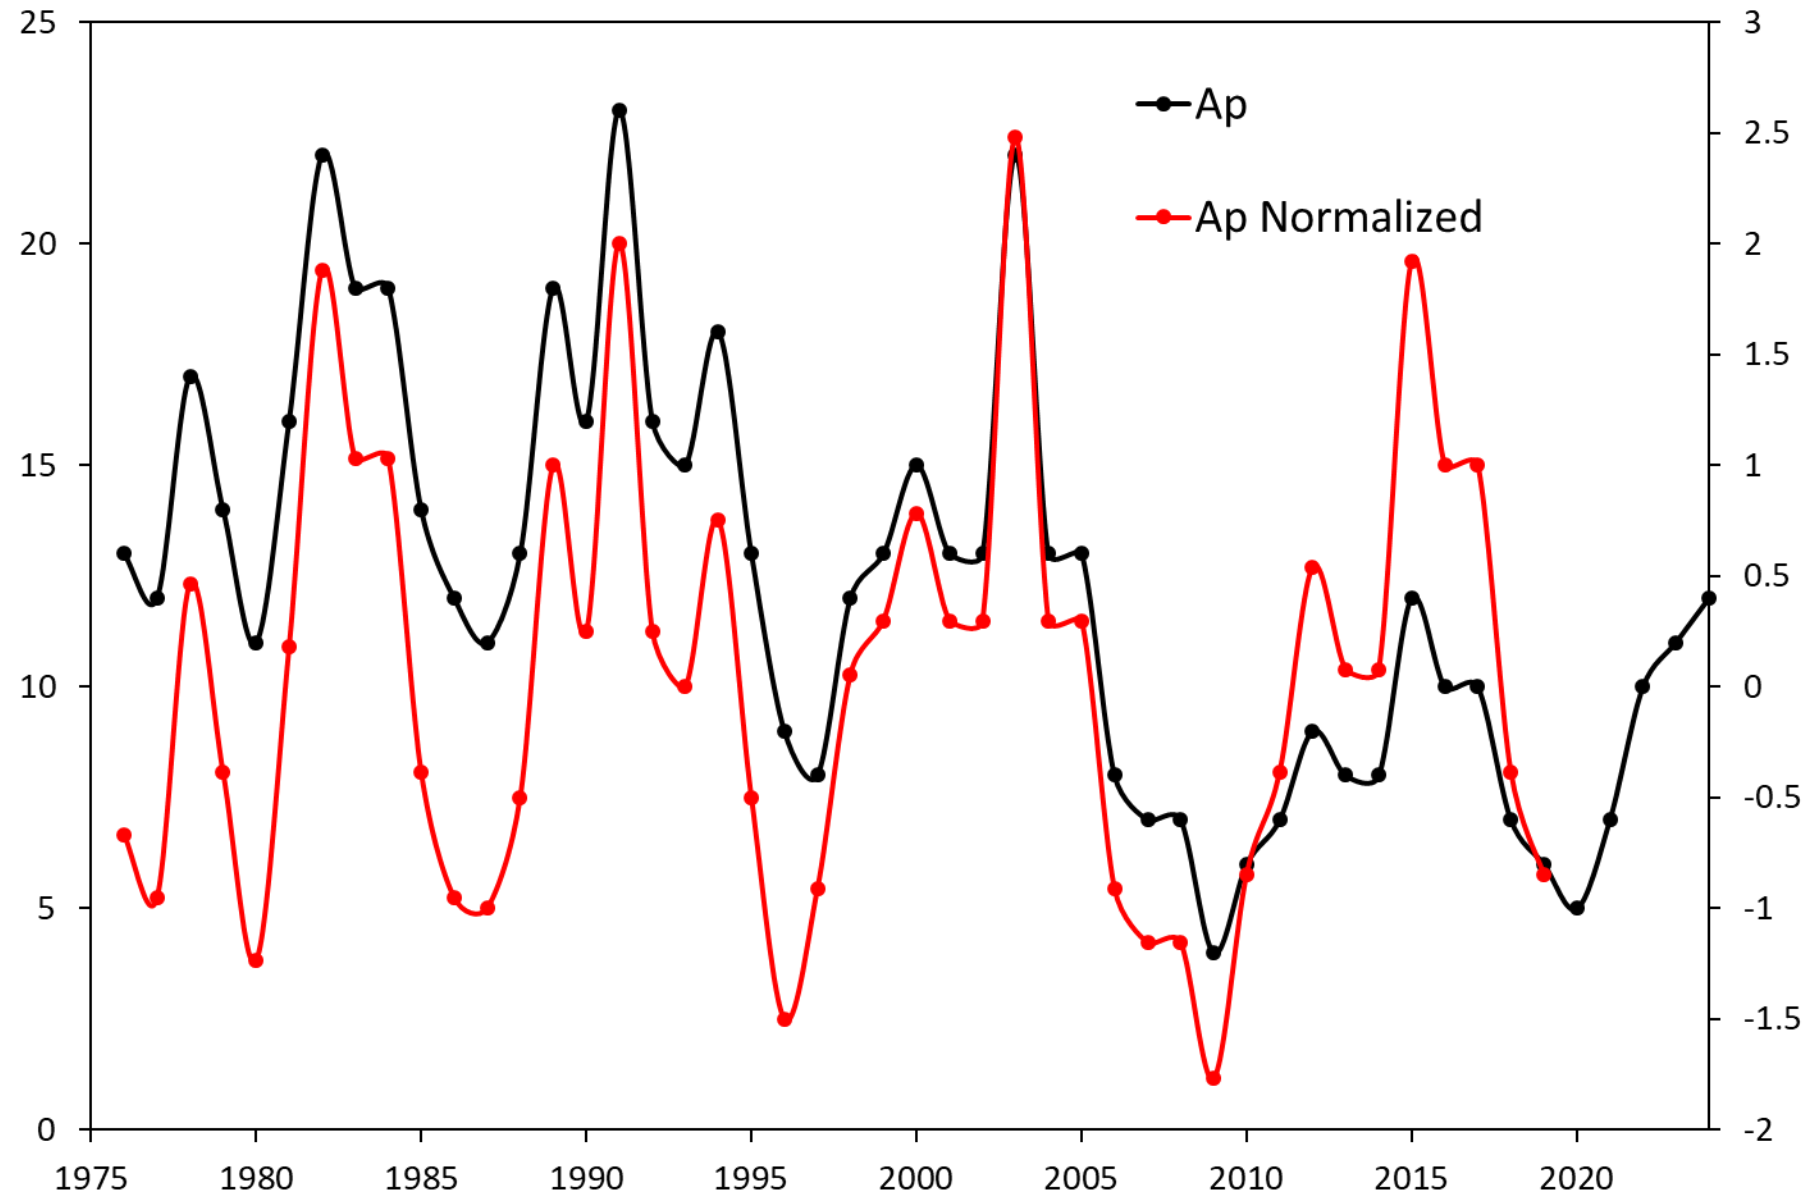

Supplement: Supplementary file [file angeo-2024-20-RC1-supplement.pdf]
